# Supplementary material
Source: PubMed Central journal article supplement (PMC6302322)
Supplement: CJN.06660518SupplementaryData.pdf [file CJN.06660518SupplementaryData.pdf]

## **Technical appendix to “The Effect of Insurance in the First Three Months of Hemodialysis on Vascular Access”**

### **APPENDIX A: Technical Specifications**

#### *Data Sources*

Data came from the United States Renal Data System (USRDS), a registry with claims data for all patients with Medicare Parts A and B and ESKD. We used the CMS Medical Evidence Report (Form CMS-2728) to identify dialysis modality, vascular access, insurance coverage, pre-ESKD nephrology care, demographics, and comorbid conditions at dialysis onset. We obtained longitudinal insurance, treatment, and vascular access information from Medicare enrollment data and claims. Medicare claims have included the type of vascular access used at the end of each month since July 2010. We linked patient zip codes to the 2010 Census and 2012 American Community Survey and obtained dialysis facility-level data from annual facility surveys.

#### *Identification of Vascular Access on Dialysis Claims*

We used modifier codes on dialysis claims to identify the type of vascular access. The modifier code V5 indicated the use of a central venous catheter, V6 indicated the use of an arteriovenous graft, and V7 indicated the use of an arteriovenous fistula for that month of dialysis.<sup>1</sup>

#### *Identification of Hospitalizations due to Vascular Access Infections*

To identify hospitalizations due to infected vascular access, we first isolated acute hospitalizations from Medicare inpatient claims. Individual claims do not constitute acute admissions for two reasons. First, the United States Renal Data System (USRDS) inpatient claims file also contains admissions to inpatient rehabilitation and long-term care hospitals. Second, transfers between hospitals are billed as separate claims and thus need to be grouped

into a single admission. Therefore, we used a previously described algorithm to isolate acute inpatient stays and to group transfers into single admissions.<sup>2</sup>

We then identified the acute admissions that involved vascular access infections and those that involved any infection. To identify vascular access infections, we took the array of diagnosis codes (ICD-9 or International Classification of Diseases 9) and identified admissions with a diagnosis code that matched one of the codes in **Table S1**. For admissions that involved any infection, we matched diagnosis codes with the list in **Table S2**.

**Table S1: Diagnosis Codes Corresponding to Center Venous Catheter Infections**

| ICD-9 Diagnosis Codes |                                                                                     |
|-----------------------|-------------------------------------------------------------------------------------|
| 996.62                | Infection and Inflammatory Reaction due to other Vascular Device, Implant, or Graft |
| 999.31                | Other and unspecified infection due to central venous catheter                      |
| 999.32                | Bloodstream infection due to central venous catheter                                |
| 999.33                | Local infection due to central venous catheter                                      |

**Abbreviations:** ICD-9 = International Classification of Diseases

**Table S2: Diagnosis Codes Corresponding to Any Infection**

| ICD-9 Diagnosis Codes                                                                                                                                              |
|--------------------------------------------------------------------------------------------------------------------------------------------------------------------|
| 001–134, 136, 254.1                                                                                                                                                |
| 320–325, 382–382.4, 383.0–383.2, 386.33, 386.35, 388.60                                                                                                            |
| 421–421.1, 422.0, 422.92–422.93, 460–466, 475–476.0, 478.21–478.24, 478.29, 480–489                                                                                |
| 510–511.1, 513, 519.01, 522.5, 522.7, 527.3, 528.3, 566–567.9, 569.5, 572–572.1, 573.1–573.3, 575.10–575.12, 576.1, 590–590.9, 595–595.4, 597–597.89, 598.0, 599.0 |
| 601–601.9, 604–604.9, 607.1, 607.2, 608.0, 608.4, 611.0, 614–616.1, 616.3–616.4, 616.8, 670, 675, 680–686.9                                                        |
| 706.0, 711–711.9, 728.0, 728.86, 729.39, 729.4, 730–730.3, 730.8–730.9, 790.7–790.8                                                                                |
| 995.9, 996.60–996.69, 997.62, 998.5, 999.3                                                                                                                         |

**Abbreviations:** ICD-9 = International Classification of Diseases

### Calculation of Relative Risks

Odds ratios from logistic regression can be difficult to interpret, since the corresponding relative risk is dependent on the baseline event rate. To make these estimates more tangible, we calculated the predicted probability that each patient used an arteriovenous (AV) fistula or graft at the end of month four under the scenarios that the patient had insurance or was uninsured. The point estimate for the average relative risk, then, is the average of the quotient of these predicted probabilities. To obtain 95% confidence intervals, we used a non-parametric bootstrap. We describe our method to compute bootstrapped 95% confidence intervals on multiple imputation data later in this Appendix.

More formally, we specified the following logistic regression model:

$$Y_i | \beta_0 + X_{insurance,i} \beta_{insurance} + X_{covariates,i} \beta_{covariates} + \varepsilon_i$$

Here, we defined the outcome ( $Y_i$ ) as the outcome that patient  $i$  was using an AV fistula or graft at the end of month four. We modeled  $Y_i$  using a Bernoulli distribution and a logit link function. In this model,  $X_{insurance,i}$  is a binary exposure variable that indicates if patient  $i$  has insurance (1 if patient  $i$  has Medicare or Medicaid depending on the cohort and 0 if patient  $i$  is uninsured),  $X_{covariates,i}$  is a vector of all other covariates,  $\beta_{insurance}$  and  $\beta_{covariates}$  are the respective coefficients from the regression,  $\beta_0$  is the intercept, and  $\varepsilon_i$  is the randomly distributed error term for patient  $i$ . We defined the estimated coefficients from this model as  $\hat{\beta}_0$ ,  $\hat{\beta}_{insurance}$ , and  $\hat{\beta}_{covariates}$ .

For each patient in the cohort, we calculated the predicted probability that the patient used AV fistula or graft at the end of month four under the scenarios that the patient had insurance ( $\hat{Y}_{i,insurance}$ ) or was uninsured ( $\hat{Y}_{i,uninsured}$ ). In other words, for each patient  $i$ :

$$\hat{Y}_{i,insurance} = \text{logit}^{-1}(\hat{\beta}_0 + \hat{\beta}_{insurance} + X_{covariates,i} \hat{\beta}_{covariates})$$

$$\hat{Y}_{i,uninsured} = \text{logit}^{-1}(\hat{\beta}_0 + X_{covariates,i} \hat{\beta}_{covariates})$$

For a patient  $i$ , we defined the adjusted relative risk of using an AV fistula or graft at month 4 when patient  $i$  has insurance *versus* no insurance:

Supplemental material is neither peer-reviewed nor thoroughly edited by CJASN. The authors alone are responsible for the accuracy and presentation of the material.

$$RR_i = \frac{\hat{Y}_{i,insurnace}}{\hat{Y}_{i,uninsured}}$$

and the average relative risk of patients with insurance versus those without insurance is:

$$\overline{RR} = \frac{1}{N} \sum_{i=1}^N RR_i$$

### Estimating the Probability of AVF/AVG Use by Month 13

Using logistic regression to estimate the probability of AVF or AVG use by month 13 would have introduced bias due to the high mortality rate in this population. To account for censoring, we employed a 2-step estimation procedure to obtain predicted probabilities. First, for each patient, we obtained the predicted probabilities of using a dialysis catheter at month 4, under the scenarios that the patient had insurance or was uninsured:

$$\widehat{\Pr}(\text{catheter at month 4} | \text{insured}) = 1 - \hat{Y}_{i,insurnace}$$

$$\widehat{\Pr}(\text{catheter at month 4} | \text{uninsured}) = 1 - \hat{Y}_{i,uninsured}$$

Next, we took patients still using a catheter at month 4 and estimated a parameterized survival model assuming an exponential survival function to determine the rate of switching from a catheter to an AVF or AVG, censoring for death. These regression estimates allowed us to estimate the probability of using a catheter at month 12 for each patient, *conditional* on using a catheter at month 4, for the scenarios that the patient had insurance or was uninsured:

$$\hat{Z}_{i,insurance} = \Pr(\text{catheter at month 12} | \text{catheter at month 4, insured})$$

$$\hat{Z}_{i,uninsured} = \Pr(\text{catheter at month 12} | \text{catheter at month 4, uninsured})$$

Using Baye's rule, we then estimated the unconditional probability of using an AVF or AVG by month 12, for the scenarios that the patient had insurance or was insured:

Supplemental material is neither peer-reviewed nor thoroughly edited by CJASN. The authors alone are responsible for the accuracy and presentation of the material.

$$\begin{aligned}\widehat{W}_{i,insurance} &= \Pr(AVF/AVG \text{ by month 12} | insured) = 1 - \Pr(\text{catheter at month 12} | insured) \\ &= 1 - \Pr(\text{catheter at month 12} | \text{catheter at month 4, insured}) \\ &\quad * \Pr(\text{catheter at month 4} | insured) = 1 - \widehat{Z}_{i,insurance} * (1 - \widehat{Y}_{i,insurance})\end{aligned}$$

$$\begin{aligned}\widehat{W}_{i,uninsured} &= \Pr(AVF/AVG \text{ by month 12} | uninsured) \\ &= 1 - \Pr(\text{catheter at month 12} | uninsured) \\ &= 1 - \Pr(\text{catheter at month 12} | \text{catheter at month 4, uninsured}) \\ &\quad * \Pr(\text{catheter at month 4} | uninsured) = 1 - \widehat{Z}_{i,uninsured} * (1 - \widehat{Y}_{i,uninsured})\end{aligned}$$

The average relative risk for using an AVF or AVG by month 12 is then:

$$\overline{RR}_{month13} = \frac{1}{N} \sum_{i=1}^N \frac{\widehat{W}_{i,insurance}}{\widehat{W}_{i,uninsured}}$$

### Multiple Imputation

Because we had high numbers of missing values for body mass index (BMI), hemoglobin, and albumin, we used multiple imputation for these covariates. Since all missing covariates were categorical variables, we imputed these variables using chained equations and a multinomial logistic regression model with the augmented-regression approach suggested by White *et al.* to avoid bias from perfect prediction of categorical variables.<sup>3-5</sup> For each statistic, we calculated the point estimate and 95% confidence interval using Rubin's rules.<sup>6</sup> Since these rules do not apply for bootstrapped confidence intervals, we used a different process to perform statistical inference on relative risks, which we describe below. We used a total of 10 imputations for each missing variable.

### Statistical Inference using Bootstrap Confidence Intervals

We used non-parametric bootstrap 95% confidence intervals to assess if the relative risks were statistically significant. Schomaker and Heumann suggest that in order to obtain the

*Supplemental material is neither peer-reviewed nor thoroughly edited by CJASN. The authors alone are responsible for the accuracy and presentation of the material.*

correct standard errors we should first draw  $b = 1, \dots, B$  bootstrap samples from the original dataset *with* missing values, then perform  $m_b = 1, \dots, M_B$  imputations on each of the  $B$  bootstrapped datasets.<sup>7</sup> The sampling-imputation process yields  $B \times M_B$  bootstrapped-imputed datasets, and we can calculate a relative risk for each of these datasets:  $RR_{b,m_b}$ . To find confidence intervals, we first compute  $RR_b = \frac{1}{M_B} \sum_{m_b} RR_{b,m_b}$ , which is the mean of the “imputed” relative risks for each of the  $B$  bootstrapped datasets. We then take the 2.5% and 97.5% quantiles of  $RR_b$ . (Of note, we could simply take the 2.5% and 97.5% quantiles of all estimates  $RR_{b,m_b}$  for all  $b$  and  $m_b$ . Schomaker and Heumann suggest that this approach yields confidence intervals that are too wide). We again chose a total of ten imputations for each of the bootstrapped datasets ( $M_B = 10$ ) and drew  $B = 250$  bootstrapped samples.

#### *Additional Analyses and Sensitivity Analyses*

It is possible that for some patients AVFs or (to a lesser extent) AVGs were not ready for use by the end of the fourth dialysis month, due to delayed maturation or healing. To investigate this possibility, we performed the following sensitivity analyses:

- 1) We modeled the likelihood of using an AVF or AVG by the end of the sixth dialysis month using a multivariable logistic regression. This is in contrast to our primary analysis, which examined the likelihood of using an AVF or AVG by the end of the fourth dialysis month.
- 2) We restricted our study population to patients receiving hemodialysis through a central venous catheter at the end of the fourth dialysis month, and we examined the time to switching from a central venous catheter to an AVF or AVG using a competing risks model. In our primary analysis, we used a traditional Cox regression.

We also performed the following additional analyses to test model specifications:

*Supplemental material is neither peer-reviewed nor thoroughly edited by CJASN. The authors alone are responsible for the accuracy and presentation of the material.*

- 3) We included patients with nephrology care prior to developing ESKD and incorporated an indicator for whether a patient received such care.
- 4) We repeated all primary analyses using a complete case analysis.

None of our results changed materially in these sensitivity analyses (**Table S11**):

## APPENDIX B: Supplemental Tables

In **Tables S3-S10**, we show the regression coefficients from the primary analyses and analyses of hospitalization involving vascular access infection. We then show results from secondary study aims and sensitivity analyses in **Table S11**.

**Table S3: Logistic Regression Coefficients, Modeling Arteriovenous Fistula or Graft Use at Month 4, Medicare versus No Insurance, Multiple Imputation Analysis**

| Covariate                     | OR   | 95% CI       | P-Value |
|-------------------------------|------|--------------|---------|
| <b>Intercept</b>              | 0.07 | (0.03, 0.15) | ***     |
| <b>Insurance</b>              |      |              |         |
| No insurance                  |      | Reference    |         |
| Medicare                      | 2.00 | (1.26, 3.16) | **      |
| <b>Dual Eligible</b>          | 1.13 | (0.93, 1.38) |         |
| <b>Age</b>                    | 0.83 | (0.47, 1.47) |         |
| <b>Age<sup>2</sup></b>        | 1.63 | (0.37, 7.26) |         |
| <b>Sex</b>                    |      |              |         |
| Female                        | 0.69 | (0.58, 0.80) | ***     |
| Male                          |      | Reference    |         |
| <b>Race</b>                   |      |              |         |
| White                         |      | Reference    |         |
| Black                         | 1.39 | (1.15, 1.69) | ***     |
| Other                         | 1.58 | (1.09, 2.28) | *       |
| <b>Ethnicity</b>              |      |              |         |
| Hispanic                      | 1.34 | (1.05, 1.71) | *       |
| <b>Employed</b>               | 0.75 | (0.50, 1.12) |         |
| <b>BMI (kg/m<sup>2</sup>)</b> |      |              |         |
| < 18.5                        | 0.96 | (0.62, 1.47) |         |
| 18.5 to < 30                  |      | Reference    |         |
| 30 to < 40                    | 1.05 | (0.88, 1.25) |         |
| ≥ 40                          | 0.98 | (0.74, 1.28) |         |



Supplemental material is neither peer-reviewed nor thoroughly edited by CJASN. The authors alone are responsible for the accuracy and presentation of the material.

|                                                         |      |              |    |
|---------------------------------------------------------|------|--------------|----|
| <b>Albumin (g/dL)</b>                                   |      |              |    |
| < 2.5                                                   | 0.65 | (0.49, 0.87) | ** |
| 2.5 to < 3                                              | 0.91 | (0.71, 1.16) |    |
| 3 to < 3.5                                              | 0.88 | (0.70, 1.12) |    |
| ≥ 3.5                                                   |      | Reference    |    |
| <b>Hemoglobin category (g/dL)</b>                       |      |              |    |
| < 8                                                     | 1.05 | (0.82, 1.33) |    |
| 8 to < 9                                                | 1.03 | (0.84, 1.25) |    |
| 9 to < 11                                               |      | Reference    |    |
| ≥ 11                                                    | 1.00 | (0.78, 1.28) |    |
| <b>Comorbidities</b>                                    |      |              |    |
| Coronary Artery Disease                                 | 1.03 | (0.84, 1.27) |    |
| Congestive Heart Failure                                | 0.92 | (0.77, 1.09) |    |
| Cancer                                                  | 0.82 | (0.61, 1.10) |    |
| Hypertension                                            | 0.96 | (0.76, 1.22) |    |
| Chronic Obstructive Pulmonary Disease                   | 0.81 | (0.63, 1.04) |    |
| Diabetes Mellitus                                       | 1.17 | (0.99, 1.39) |    |
| Peripheral Vascular Disease                             | 0.82 | (0.65, 1.04) |    |
| Prior Cerebrovascular Accident                          | 1.47 | (1.17, 1.84) | ** |
| Drug Dependence                                         | 1.05 | (0.65, 1.71) |    |
| Smoker                                                  | 1.14 | (0.85, 1.53) |    |
| Patient institutionalized                               | 0.85 | (0.64, 1.13) |    |
| Needs Assistance with ADLs and/or Inability to Transfer | 0.81 | (0.64, 1.03) |    |
| <b>Facility Characteristics</b>                         |      |              |    |
| Large Dialysis Organization                             | 1.09 | (0.91, 1.31) |    |
| Facility is for-profit                                  | 0.90 | (0.67, 1.22) |    |
| Facility is hospital-based                              | 1.22 | (0.83, 1.78) |    |
| <b>Total Facility Patients per Year</b>                 |      |              |    |
| 0 to 50                                                 | 1.25 | (1.01, 1.53) | *  |
| 51 to 100                                               |      | Reference    |    |
| 101 to 150                                              | 1.09 | (0.89, 1.33) |    |
| > 150                                                   | 0.88 | (0.69, 1.13) |    |
| <b>Full Time Patient to Nurse/Tech Ratio</b>            |      |              |    |
| < 7                                                     |      | Reference    |    |
| ≥ 7                                                     | 1.05 | (0.89, 1.23) |    |
| <b>Residence Characteristics</b>                        |      |              |    |

Supplemental material is neither peer-reviewed nor thoroughly edited by CJASN. The authors alone are responsible for the accuracy and presentation of the material.

|                                                     |      |              |   |
|-----------------------------------------------------|------|--------------|---|
| Urban                                               | 1.12 | (0.94, 1.33) |   |
| <b>% Poverty in Zipcode</b>                         |      |              |   |
| < 15%                                               |      | Reference    |   |
| 15% to <25%                                         | 0.92 | (0.74, 1.13) |   |
| ≥ 25%                                               | 0.88 | (0.68, 1.14) |   |
| <b>% Less than High school Education in Zipcode</b> |      |              |   |
| < 15%                                               |      | Reference    |   |
| 15% to <30%                                         | 1.19 | (0.97, 1.46) |   |
| ≥ 30%                                               | 1.44 | (1.05, 1.97) | * |
| <b>Year of Dialysis Start</b>                       |      |              |   |
| 2010                                                |      | Reference    |   |
| 2011                                                | 1.01 | (0.79, 1.29) |   |
| 2012                                                | 1.04 | (0.81, 1.33) |   |
| 2013                                                | 1.34 | (1.01, 1.79) | * |
| <b>Season of Dialysis Start</b>                     |      |              |   |
| Winter                                              |      | Reference    |   |
| Spring                                              | 1.29 | (1.04, 1.59) | * |
| Summer                                              | 0.99 | (0.80, 1.22) |   |
| Fall                                                | 1.07 | (0.85, 1.35) |   |

\*\*\*  $p < 0.001$

\*\*  $p < 0.01$

\*  $p < 0.05$

Note: Includes robust standard errors.

Supplemental material is neither peer-reviewed nor thoroughly edited by CJASN. The authors alone are responsible for the accuracy and presentation of the material.

**Table S4: Logistic Regression Coefficients, Modeling Arteriovenous Fistula or Graft Use at Month 4, Medicaid versus No Insurance, Multiple Imputation Analysis**

| Covariate                         | OR   | 95% CI       | P-Value |
|-----------------------------------|------|--------------|---------|
| <b>Intercept</b>                  | 0.07 | (0.04, 0.10) | ***     |
| <b>Insurance</b>                  |      |              |         |
| No insurance                      |      | Reference    |         |
| Medicaid                          | 1.27 | (1.13, 1.43) | ***     |
| <b>Age</b>                        | 0.90 | (0.75, 1.09) |         |
| <b>Age<sup>2</sup></b>            | 0.98 | (0.94, 1.03) |         |
| <b>Sex</b>                        |      |              |         |
| Female                            | 0.78 | (0.69, 0.88) | ***     |
| Male                              |      | Reference    |         |
| <b>Race</b>                       |      |              |         |
| White                             |      | Reference    |         |
| Black                             | 1.17 | (1.01, 1.35) | *       |
| Other                             | 1.44 | (1.12, 1.85) | **      |
| <b>Ethnicity</b>                  |      |              |         |
| Hispanic                          | 1.13 | (0.95, 1.33) |         |
| <b>Employed</b>                   | 0.73 | (0.61, 0.88) | ***     |
| <b>BMI (kg/m<sup>2</sup>)</b>     |      |              |         |
| < 18.5                            | 0.83 | (0.58, 1.19) |         |
| 18.5 to < 30                      |      | Reference    |         |
| 30 to < 40                        | 0.98 | (0.86, 1.11) |         |
| ≥ 40                              | 0.99 | (0.82, 1.19) |         |
| <b>Albumin (g/dL)</b>             |      |              |         |
| < 2.5                             | 0.76 | (0.63, 0.93) | **      |
| 2.5 to < 3                        | 0.91 | (0.76, 1.09) |         |
| 3 to < 3.5                        | 0.86 | (0.73, 1.02) |         |
| ≥ 3.5                             |      | Reference    |         |
| <b>Hemoglobin category (g/dL)</b> |      |              |         |
| < 8                               | 0.99 | (0.84, 1.16) |         |
| 8 to < 9                          | 1.14 | (0.97, 1.33) |         |

Supplemental material is neither peer-reviewed nor thoroughly edited by CJASN. The authors alone are responsible for the accuracy and presentation of the material.

|                                                         |      |              |     |
|---------------------------------------------------------|------|--------------|-----|
| 9 to < 11                                               |      | Reference    |     |
| ≥ 11                                                    | 1.07 | (0.90, 1.29) |     |
| <b>Comorbidities</b>                                    |      |              |     |
| Coronary Artery Disease                                 | 1.00 | (0.80, 1.24) |     |
| Congestive Heart Failure                                | 1.07 | (0.93, 1.23) |     |
| Cancer                                                  | 0.48 | (0.29, 0.79) | **  |
| Hypertension                                            | 1.22 | (1.01, 1.47) | *   |
| Chronic Obstructive Pulmonary Disease                   | 1.05 | (0.80, 1.38) |     |
| Diabetes Mellitus                                       | 0.94 | (0.83, 1.07) |     |
| Peripheral Vascular Disease                             | 1.23 | (0.97, 1.54) |     |
| Prior Cerebrovascular Accident                          | 1.15 | (0.90, 1.46) |     |
| Drug Dependence                                         | 0.95 | (0.75, 1.20) |     |
| Smoker                                                  | 1.10 | (0.92, 1.32) |     |
| Patient institutionalized                               | 0.73 | (0.49, 1.07) |     |
| Needs Assistance with ADLs and/or Inability to Transfer | 0.95 | (0.75, 1.21) |     |
| <b>Facility Characteristics</b>                         |      |              |     |
| Large Dialysis Organization                             | 1.27 | (1.11, 1.46) | *** |
| Facility is for-profit                                  | 0.90 | (0.73, 1.11) |     |
| Facility is hospital-based                              | 1.22 | (0.93, 1.61) |     |
| <b>Total Facility Patients per Year</b>                 |      |              |     |
| 0 to 50                                                 | 1.00 | (0.85, 1.18) |     |
| 51 to 100                                               |      | Reference    |     |
| 101 to 150                                              | 0.89 | (0.77, 1.03) |     |
| > 150                                                   | 0.95 | (0.80, 1.12) |     |
| <b>Full Time Patient to Nurse/Tech Ratio</b>            |      |              |     |
| < 7                                                     |      | Reference    |     |
| ≥ 7                                                     | 0.97 | (0.86, 1.09) |     |
| <b>Residence Characteristics</b>                        |      |              |     |
| Urban                                                   | 1.00 | (0.87, 1.14) |     |
| <b>% Poverty in Zipcode</b>                             |      |              |     |
| < 15%                                                   |      | Reference    |     |
| 15% to <25%                                             | 1.00 | (0.86, 1.16) |     |
| ≥ 25%                                                   | 0.86 | (0.72, 1.04) |     |
| <b>% Less than High school Education in Zipcode</b>     |      |              |     |
| < 15%                                                   |      | Reference    |     |

*Supplemental material is neither peer-reviewed nor thoroughly edited by CJASN. The authors alone are responsible for the accuracy and presentation of the material.*

|                                 |      |              |    |
|---------------------------------|------|--------------|----|
| 15% to <30%                     | 1.05 | (0.90, 1.21) |    |
| ≥ 30%                           | 1.21 | (0.99, 1.50) |    |
| <b>Year of Dialysis Start</b>   |      |              |    |
| 2010                            |      | Reference    |    |
| 2011                            | 1.18 | (0.98, 1.42) |    |
| 2012                            | 1.20 | (0.99, 1.44) |    |
| 2013                            | 1.41 | (1.14, 1.74) | ** |
| <b>Season of Dialysis Start</b> |      |              |    |
| Winter                          |      | Reference    |    |
| Spring                          | 1.24 | (1.06, 1.44) | ** |
| Summer                          | 1.00 | (0.85, 1.17) |    |
| Fall                            | 0.98 | (0.83, 1.16) |    |

\*\*\* p < 0.001

\*\* p < 0.01

\* p < 0.05

Note: Includes robust standard errors.

Supplemental material is neither peer-reviewed nor thoroughly edited by CJASN. The authors alone are responsible for the accuracy and presentation of the material.

**Table S5: Cox Regression Coefficients, Modeling Time to Arteriovenous Fistula or Graft Use, Medicare versus No Insurance, Multiple Imputation Analysis**

| <b>Covariate</b>                  | <b>HR</b> | <b>95% CI</b> | <b>P-Value</b> |
|-----------------------------------|-----------|---------------|----------------|
| <b>Insurance</b>                  |           |               |                |
| No insurance                      |           | Reference     |                |
| Medicare                          | 1.14      | (0.94, 1.39)  |                |
| <b>Dual Eligible</b>              |           |               |                |
|                                   | 1.03      | (0.93, 1.14)  |                |
| <b>Age</b>                        |           |               |                |
| Age                               | 0.91      | (0.69, 1.20)  |                |
| Age <sup>2</sup>                  | 1.54      | (0.82, 2.89)  |                |
| <b>Sex</b>                        |           |               |                |
| Female                            | 0.91      | (0.84, 0.98)  | *              |
| Male                              |           | Reference     |                |
| <b>Race</b>                       |           |               |                |
| White                             |           | Reference     |                |
| Black                             | 1.10      | (1.00, 1.22)  |                |
| Other                             | 1.41      | (1.18, 1.68)  | ***            |
| <b>Ethnicity</b>                  |           |               |                |
| Hispanic                          | 1.27      | (1.13, 1.44)  | ***            |
| <b>Employed</b>                   |           |               |                |
|                                   | 1.13      | (0.95, 1.33)  |                |
| <b>BMI (kg/m<sup>2</sup>)</b>     |           |               |                |
| < 18.5                            | 0.82      | (0.65, 1.04)  |                |
| 18.5 to < 30                      |           | Reference     |                |
| 30 to < 40                        | 0.94      | (0.86, 1.03)  |                |
| ≥ 40                              | 0.99      | (0.87, 1.12)  |                |
| <b>Albumin (g/dL)</b>             |           |               |                |
| < 2.5                             | 0.81      | (0.71, 0.94)  | **             |
| 2.5 to < 3                        | 0.87      | (0.76, 0.99)  | *              |
| 3 to < 3.5                        | 0.88      | (0.77, 1.00)  |                |
| ≥ 3.5                             |           | Reference     |                |
| <b>Hemoglobin category (g/dL)</b> |           |               |                |
| < 8                               | 0.94      | (0.83, 1.06)  |                |
| 8 to < 9                          | 0.92      | (0.83, 1.02)  |                |

Supplemental material is neither peer-reviewed nor thoroughly edited by CJASN. The authors alone are responsible for the accuracy and presentation of the material.

|                                                         |      |              |     |
|---------------------------------------------------------|------|--------------|-----|
| 9 to < 11                                               |      | Reference    |     |
| ≥ 11                                                    | 0.90 | (0.79, 1.02) |     |
| <b>Comorbidities</b>                                    |      |              |     |
| Coronary Artery Disease                                 | 0.92 | (0.83, 1.02) |     |
| Congestive Heart Failure                                | 0.94 | (0.86, 1.02) |     |
| Cancer                                                  | 0.85 | (0.73, 0.99) | *   |
| Hypertension                                            | 1.12 | (0.99, 1.26) |     |
| Chronic Obstructive Pulmonary Disease                   | 0.94 | (0.83, 1.05) |     |
| Diabetes Mellitus                                       | 1.08 | (1.00, 1.18) |     |
| Peripheral Vascular Disease                             | 1.07 | (0.95, 1.20) |     |
| Prior Cerebrovascular Accident                          | 0.99 | (0.87, 1.12) |     |
| Drug Dependence                                         | 0.85 | (0.65, 1.11) |     |
| Smoker                                                  | 1.08 | (0.93, 1.24) |     |
| Patient institutionalized                               | 0.85 | (0.73, 0.98) | *   |
| Needs Assistance with ADLs and/or Inability to Transfer | 0.81 | (0.71, 0.91) | *** |
| <b>Facility Characteristics</b>                         |      |              |     |
| Large Dialysis Organization                             | 1.30 | (1.19, 1.43) | *** |
| Facility is for-profit                                  | 0.85 | (0.73, 0.99) | *   |
| Facility is hospital-based                              | 0.91 | (0.74, 1.12) |     |
| <b>Total Facility Patients per Year</b>                 |      |              |     |
| 0 to 50                                                 | 1.08 | (0.98, 1.20) |     |
| 51 to 100                                               |      | Reference    |     |
| 101 to 150                                              | 1.02 | (0.92, 1.12) |     |
| > 150                                                   | 0.89 | (0.79, 1.01) |     |
| <b>Full Time Patient to Nurse/Tech Ratio</b>            |      |              |     |
| < 7                                                     |      | Reference    |     |
| ≥ 7                                                     | 1.02 | (0.94, 1.10) |     |
| <b>Residence Characteristics</b>                        |      |              |     |
| Urban                                                   | 1.00 | (0.92, 1.09) |     |
| <b>% Poverty in Zipcode</b>                             |      |              |     |
| < 15%                                                   |      | Reference    |     |
| 15% to <25%                                             | 1.08 | (0.98, 1.19) |     |
| ≥ 25%                                                   | 1.03 | (0.91, 1.17) |     |
| <b>% Less than High school Education in Zipcode</b>     |      |              |     |
| < 15%                                                   |      | Reference    |     |
| 15% to <30%                                             | 0.96 | (0.87, 1.06) |     |

Supplemental material is neither peer-reviewed nor thoroughly edited by CJASN. The authors alone are responsible for the accuracy and presentation of the material.

|                                 |      |              |   |
|---------------------------------|------|--------------|---|
| ≥ 30%                           | 1.07 | (0.92, 1.25) |   |
| <b>Year of Dialysis Start</b>   |      |              |   |
| 2010                            |      | Reference    |   |
| 2011                            | 1.13 | (1.00, 1.26) | * |
| 2012                            | 1.16 | (1.03, 1.31) | * |
| 2013                            | 1.16 | (0.99, 1.37) |   |
| <b>Season of Dialysis Start</b> |      |              |   |
| Winter                          |      | Reference    |   |
| Spring                          | 1.02 | (0.91, 1.14) |   |
| Summer                          | 1.00 | (0.90, 1.11) |   |
| Fall                            | 1.08 | (0.97, 1.20) |   |

---

\*\*\* p < 0.001

\*\* p < 0.01

\* p < 0.05



Supplemental material is neither peer-reviewed nor thoroughly edited by CJASN. The authors alone are responsible for the accuracy and presentation of the material.

**Table S6: Cox Regression Coefficients, Modeling Time to Arteriovenous Fistula or Graft Use, Medicaid versus No Insurance, Multiple Imputation Analysis**

| Covariate                         | HR   | 95% CI       | P-Value |
|-----------------------------------|------|--------------|---------|
| <b>Insurance</b>                  |      |              |         |
| No insurance                      |      | Reference    |         |
| Medicaid                          | 1.00 | (0.95, 1.05) |         |
| <b>Age</b>                        |      |              |         |
| Age                               | 0.90 | (0.83, 0.97) | **      |
| Age <sup>2</sup>                  | 0.97 | (0.96, 0.99) | **      |
| <b>Sex</b>                        |      |              |         |
| Female                            | 0.83 | (0.79, 0.87) | ***     |
| Male                              |      | Reference    |         |
| <b>Race</b>                       |      |              |         |
| White                             |      | Reference    |         |
| Black                             | 1.01 | (0.95, 1.08) |         |
| Other                             | 1.22 | (1.09, 1.36) | ***     |
| <b>Ethnicity</b>                  |      |              |         |
| Hispanic                          | 1.12 | (1.05, 1.20) | **      |
| <b>Employed</b>                   |      |              |         |
| Employed                          | 0.99 | (0.93, 1.06) |         |
| <b>BMI (kg/m<sup>2</sup>)</b>     |      |              |         |
| < 18.5                            | 0.91 | (0.78, 1.07) |         |
| 18.5 to < 30                      |      | Reference    |         |
| 30 to < 40                        | 0.97 | (0.92, 1.02) |         |
| ≥ 40                              | 1.04 | (0.97, 1.13) |         |
| <b>Albumin (g/dL)</b>             |      |              |         |
| < 2.5                             | 0.90 | (0.83, 0.98) | *       |
| 2.5 to < 3                        | 0.94 | (0.87, 1.02) |         |
| 3 to < 3.5                        | 0.95 | (0.88, 1.02) |         |
| ≥ 3.5                             |      | Reference    |         |
| <b>Hemoglobin category (g/dL)</b> |      |              |         |
| < 8                               | 1.01 | (0.95, 1.08) |         |
| 8 to < 9                          | 0.99 | (0.93, 1.06) |         |
| 9 to < 11                         |      | Reference    |         |
| ≥ 11                              | 0.98 | (0.90, 1.06) |         |

Supplemental material is neither peer-reviewed nor thoroughly edited by CJASN. The authors alone are responsible for the accuracy and presentation of the material.

|                                                         |      |              |     |
|---------------------------------------------------------|------|--------------|-----|
| <b>Comorbidities</b>                                    |      |              |     |
| Coronary Artery Disease                                 | 0.99 | (0.90, 1.10) |     |
| Congestive Heart Failure                                | 0.94 | (0.89, 1.00) |     |
| Cancer                                                  | 0.74 | (0.62, 0.88) | *** |
| Hypertension                                            | 1.15 | (1.07, 1.24) | *** |
| Chronic Obstructive Pulmonary Disease                   | 1.06 | (0.94, 1.19) |     |
| Diabetes Mellitus                                       | 0.99 | (0.94, 1.05) |     |
| Peripheral Vascular Disease                             | 0.92 | (0.83, 1.03) |     |
| Prior Cerebrovascular Accident                          | 0.96 | (0.86, 1.07) |     |
| Drug Dependence                                         | 0.97 | (0.88, 1.07) |     |
| Smoker                                                  | 1.03 | (0.95, 1.11) |     |
| Patient institutionalized                               | 0.89 | (0.76, 1.04) |     |
| Needs Assistance with ADLs and/or Inability to Transfer | 0.84 | (0.75, 0.93) | *** |
| <b>Facility Characteristics</b>                         |      |              |     |
| Large Dialysis Organization                             | 1.22 | (1.15, 1.29) | *** |
| Facility is for-profit                                  | 0.96 | (0.88, 1.05) |     |
| Facility is hospital-based                              | 0.96 | (0.85, 1.09) |     |
| <b>Total Facility Patients per Year</b>                 |      |              |     |
| 0 to 50                                                 | 0.99 | (0.93, 1.06) |     |
| 51 to 100                                               |      | Reference    |     |
| 101 to 150                                              | 0.96 | (0.91, 1.02) |     |
| > 150                                                   | 0.96 | (0.90, 1.03) |     |
| <b>Full Time Patient to Nurse/Tech Ratio</b>            |      |              |     |
| < 7                                                     |      | Reference    |     |
| ≥ 7                                                     | 1.04 | (0.99, 1.09) |     |
| <b>Residence Characteristics</b>                        |      |              |     |
| Urban                                                   | 0.95 | (0.89, 1.00) |     |
| <b>% Poverty in Zipcode</b>                             |      |              |     |
| < 15%                                                   |      | Reference    |     |
| 15% to <25%                                             | 1.03 | (0.97, 1.10) |     |
| ≥ 25%                                                   | 1.01 | (0.94, 1.09) |     |
| <b>% Less than High school Education in Zipcode</b>     |      |              |     |
| < 15%                                                   |      | Reference    |     |
| 15% to <30%                                             | 1.01 | (0.95, 1.07) |     |
| ≥ 30%                                                   | 1.02 | (0.93, 1.12) |     |

*Supplemental material is neither peer-reviewed nor thoroughly edited by CJASN. The authors alone are responsible for the accuracy and presentation of the material.*

**Year of Dialysis Start**

|      |      |              |
|------|------|--------------|
| 2010 |      | Reference    |
| 2011 | 1.04 | (0.97, 1.12) |
| 2012 | 1.07 | (0.99, 1.15) |
| 2013 | 1.09 | (0.99, 1.20) |

**Season of Dialysis Start**

|        |      |              |
|--------|------|--------------|
| Winter |      | Reference    |
| Spring | 1.04 | (0.98, 1.11) |
| Summer | 1.03 | (0.97, 1.11) |
| Fall   | 1.00 | (0.93, 1.07) |

---

\*\*\*  $p < 0.001$

\*\*  $p < 0.01$

\*  $p < 0.05$

**Table S7: Cox Regression Coefficients, Modeling Time to First Hospitalization Involving Vascular Access Infection, Medicare versus No Insurance, Multiple Imputation Analysis**

| Covariate                         | HR   | 95% CI       | P-Value |
|-----------------------------------|------|--------------|---------|
| <b>Insurance</b>                  |      |              |         |
| No insurance                      |      | Reference    |         |
| Medicare                          | 0.61 | (0.37, 1.00) | *       |
| <b>Dual Eligible</b>              |      |              |         |
|                                   | 1.05 | (0.85, 1.29) |         |
| <b>Age</b>                        |      |              |         |
| Age                               | 2.55 | (1.37, 4.74) | **      |
| Age <sup>2</sup>                  | 0.64 | (0.12, 3.27) |         |
| <b>Sex</b>                        |      |              |         |
| Female                            | 1.19 | (1.00, 1.42) |         |
| Male                              |      | Reference    |         |
| <b>Race</b>                       |      |              |         |
| White                             |      | Reference    |         |
| Black                             | 0.98 | (0.79, 1.21) |         |
| Other                             | 0.82 | (0.52, 1.31) |         |
| <b>Ethnicity</b>                  |      |              |         |
| Hispanic                          | 0.84 | (0.62, 1.15) |         |
| <b>Employed</b>                   |      |              |         |
|                                   | 0.79 | (1.32, 0.48) |         |
| <b>BMI (kg/m<sup>2</sup>)</b>     |      |              |         |
| < 18.5                            | 0.51 | (0.28, 0.95) | *       |
| 18.5 to < 30                      |      | Reference    |         |
| 30 to < 40                        | 1.02 | (0.83, 1.24) |         |
| ≥ 40                              | 1.33 | (1.03, 1.72) | *       |
| <b>Albumin (g/dL)</b>             |      |              |         |
| < 2.5                             | 1.39 | (1.06, 1.83) | *       |
| 2.5 to < 3                        | 1.14 | (0.84, 1.54) |         |
| 3 to < 3.5                        | 1.30 | (0.98, 1.72) |         |
| ≥ 3.5                             |      | Reference    |         |
| <b>Hemoglobin category (g/dL)</b> |      |              |         |
| < 8                               | 0.91 | (0.70, 1.18) |         |
| 8 to < 9                          | 1.11 | (0.90, 1.37) |         |

Supplemental material is neither peer-reviewed nor thoroughly edited by CJASN. The authors alone are responsible for the accuracy and presentation of the material.

|                                                         |      |              |     |
|---------------------------------------------------------|------|--------------|-----|
| 9 to < 11                                               |      | Reference    |     |
| ≥ 11                                                    | 0.88 | (0.65, 1.18) |     |
| <b>Comorbidities</b>                                    |      |              |     |
| Coronary Artery Disease                                 | 1.12 | (0.90, 1.39) |     |
| Congestive Heart Failure                                | 1.06 | (0.87, 1.28) |     |
| Cancer                                                  | 0.90 | (0.65, 1.24) |     |
| Hypertension                                            | 0.85 | (0.66, 1.09) |     |
| Chronic Obstructive Pulmonary Disease                   | 1.29 | (1.03, 1.63) | *   |
| Diabetes Mellitus                                       | 0.98 | (0.81, 1.18) |     |
| Peripheral Vascular Disease                             | 0.87 | (0.67, 1.12) |     |
| Prior Stroke                                            | 1.19 | (0.93, 1.51) |     |
| Drug Dependence                                         | 0.62 | (0.30, 1.28) |     |
| Smoker                                                  | 0.84 | (0.59, 1.19) |     |
| Patient institutionalized                               | 1.63 | (1.25, 2.13) | *** |
| Needs Assistance with ADLs and/or Inability to Transfer | 1.09 | (0.85, 1.40) |     |
| <b>Facility Characteristics</b>                         |      |              |     |
| Large Dialysis Organization                             | 0.97 | (0.79, 1.18) |     |
| Facility is for-profit                                  | 1.39 | (0.96, 2.01) |     |
| Facility is hospital-based                              | 1.09 | (0.70, 1.72) |     |
| <b>Total Facility Patients per Year</b>                 |      |              |     |
| 0 to 50                                                 | 1.01 | (0.80, 1.27) |     |
| 51 to 100                                               |      | Reference    |     |
| 101 to 150                                              | 0.99 | (0.79, 1.24) |     |
| > 150                                                   | 1.18 | (0.91, 1.54) |     |
| <b>Full Time Patient to Nurse/Tech Ratio</b>            |      |              |     |
| < 7                                                     |      | Reference    |     |
| ≥ 7                                                     | 0.82 | (0.98, 0.69) | *   |
| <b>Residence Characteristics</b>                        |      |              |     |
| Urban                                                   | 1.08 | (1.32, 0.89) |     |
| <b>% Poverty in Zipcode</b>                             |      |              |     |
| < 15%                                                   |      | Reference    |     |
| 15% to <25%                                             | 1.10 | (0.87, 1.40) |     |
| ≥ 25%                                                   | 1.13 | (0.85, 1.51) |     |
| <b>% Less than High school Education in Zipcode</b>     |      |              |     |
| < 15%                                                   |      | Reference    |     |
| 15% to <30%                                             | 1.07 | (0.85, 1.35) |     |

Supplemental material is neither peer-reviewed nor thoroughly edited by CJASN. The authors alone are responsible for the accuracy and presentation of the material.

|                                 |      |              |   |
|---------------------------------|------|--------------|---|
| ≥ 30%                           | 0.95 | (0.67, 1.36) |   |
| <b>Year of Dialysis Start</b>   |      |              |   |
| 2010                            |      | Reference    |   |
| 2011                            | 0.82 | (0.65, 1.05) |   |
| 2012                            | 0.77 | (0.60, 0.98) | * |
| 2013                            | 0.68 | (0.48, 0.97) | * |
| <b>Season of Dialysis Start</b> |      |              |   |
| Winter                          |      | Reference    |   |
| Spring                          | 0.82 | (0.63, 1.05) |   |
| Summer                          | 1.06 | (0.84, 1.33) |   |
| Fall                            | 0.93 | (0.73, 1.18) |   |

---

\*\*\* p < 0.001

\*\* p < 0.01

\* p < 0.05

**Table S8: Cox Regression Coefficients, Modeling Time to First Hospitalization for Involving Vascular Access Infection, Medicaid versus No Insurance, Multiple Imputation Analysis**

| Covariate                         | HR   | 95% CI       | P-Value |
|-----------------------------------|------|--------------|---------|
| <b>Insurance</b>                  |      |              |         |
| No insurance                      |      | Reference    |         |
| Medicaid                          | 1.11 | (0.99, 1.23) |         |
| <b>Age</b>                        |      |              |         |
| Age                               | 0.83 | (0.78, 0.89) | ***     |
| Age <sup>2</sup>                  | 0.98 | (0.94, 1.02) |         |
| <b>Sex</b>                        |      |              |         |
| Female                            | 1.12 | (1.00, 1.25) | *       |
| Male                              |      | Reference    |         |
| <b>Race</b>                       |      |              |         |
| White                             |      | Reference    |         |
| Black                             | 1.00 | (0.88, 1.15) |         |
| Other                             | 0.82 | (0.62, 1.10) |         |
| <b>Ethnicity</b>                  |      |              |         |
| Hispanic                          | 0.99 | (0.84, 1.18) |         |
| <b>Employed</b>                   |      |              |         |
| Employed                          | 0.90 | (0.76, 1.07) |         |
| <b>BMI (kg/m<sup>2</sup>)</b>     |      |              |         |
| < 18.5                            | 0.66 | (0.44, 0.98) | *       |
| 18.5 to < 30                      |      | Reference    |         |
| 30 to < 40                        | 1.21 | (1.07, 1.37) | **      |
| ≥ 40                              | 1.30 | (1.10, 1.54) | **      |
| <b>Albumin (g/dL)</b>             |      |              |         |
| < 2.5                             | 1.33 | (1.12, 1.59) | **      |
| 2.5 to < 3                        | 0.96 | (0.79, 1.18) |         |
| 3 to < 3.5                        | 1.00 | (0.83, 1.21) |         |
| ≥ 3.5                             |      | Reference    |         |
| <b>Hemoglobin category (g/dL)</b> |      |              |         |
| < 8                               | 1.11 | (0.95, 1.29) |         |
| 8 to < 9                          | 1.07 | (0.92, 1.25) |         |
| 9 to < 11                         |      | Reference    |         |
| ≥ 11                              | 1.01 | (0.83, 1.22) |         |

Supplemental material is neither peer-reviewed nor thoroughly edited by CJASN. The authors alone are responsible for the accuracy and presentation of the material.

|                                                         |      |              |     |
|---------------------------------------------------------|------|--------------|-----|
| <b>Comorbidities</b>                                    |      |              |     |
| Coronary Artery Disease                                 | 1.08 | (0.88, 1.32) |     |
| Congestive Heart Failure                                | 1.03 | (0.90, 1.18) |     |
| Cancer                                                  | 1.17 | (0.82, 1.66) |     |
| Hypertension                                            | 1.12 | (0.94, 1.33) |     |
| Chronic Obstructive Pulmonary Disease                   | 0.98 | (0.76, 1.26) |     |
| Diabetes Mellitus                                       | 1.06 | (0.94, 1.20) |     |
| Peripheral Vascular Disease                             | 1.18 | (0.96, 1.45) |     |
| Prior Stroke                                            | 1.07 | (0.85, 1.35) |     |
| Drug Dependence                                         | 1.41 | (1.16, 1.72) | *** |
| Smoker                                                  | 1.04 | (0.88, 1.23) |     |
| Patient institutionalized                               | 1.06 | (0.78, 1.44) |     |
| Needs Assistance with ADLs and/or Inability to Transfer | 1.11 | (0.90, 1.37) |     |
| <b>Facility Characteristics</b>                         |      |              |     |
| Large Dialysis Organization                             | 0.99 | (0.87, 1.12) |     |
| Facility is for-profit                                  | 1.27 | (1.03, 1.58) | *   |
| Facility is hospital-based                              | 1.23 | (0.94, 1.61) |     |
| <b>Total Facility Patients per Year</b>                 |      |              |     |
| 0 to 50                                                 | 0.83 | (0.70, 0.97) | *   |
| 51 to 100                                               |      | Reference    |     |
| 101 to 150                                              | 0.88 | (0.77, 1.01) |     |
| > 150                                                   | 0.94 | (0.81, 1.09) |     |
| <b>Full Time Patient to Nurse/Tech Ratio</b>            |      |              |     |
| < 7                                                     |      | Reference    |     |
| ≥ 7                                                     | 0.99 | (0.89, 1.10) |     |
| <b>Residence Characteristics</b>                        |      |              |     |
| Urban                                                   | 0.98 | (0.86, 1.12) |     |
| <b>% Poverty in Zipcode</b>                             |      |              |     |
| < 15%                                                   |      | Reference    |     |
| 15% to <25%                                             | 1.07 | (0.92, 1.25) |     |
| ≥ 25%                                                   | 1.19 | (0.99, 1.42) |     |
| <b>% Less than High school Education in Zipcode</b>     |      |              |     |
| < 15%                                                   |      | Reference    |     |
| 15% to <30%                                             | 1.00 | (0.86, 1.15) |     |
| ≥ 30%                                                   | 1.01 | (0.82, 1.25) |     |



Supplemental material is neither peer-reviewed nor thoroughly edited by CJASN. The authors alone are responsible for the accuracy and presentation of the material.

**Year of Dialysis Start**

|      |      |              |    |
|------|------|--------------|----|
| 2010 |      | Reference    |    |
| 2011 | 0.96 | (0.82, 1.12) |    |
| 2012 | 0.84 | (0.72, 0.99) | *  |
| 2013 | 0.74 | (0.60, 0.92) | ** |

**Season of Dialysis Start**

|        |      |              |   |
|--------|------|--------------|---|
| Winter |      | Reference    |   |
| Spring | 0.92 | (0.79, 1.06) |   |
| Summer | 0.88 | (0.75, 1.02) |   |
| Fall   | 0.86 | (0.74, 1.00) | * |

---

\*\*\*  $p < 0.001$

\*\*  $p < 0.01$

\*  $p < 0.05$

Supplemental material is neither peer-reviewed nor thoroughly edited by CJASN. The authors alone are responsible for the accuracy and presentation of the material.

**Table S9: Cox Regression Coefficients, Modeling Time to First Hospitalization Involving Any Infection, Medicare versus No Insurance, Multiple Imputation Analysis**

| Covariate                         | HR   | 95% CI       | P-Value |
|-----------------------------------|------|--------------|---------|
| <b>Insurance</b>                  |      |              |         |
| No insurance                      |      | Reference    |         |
| Medicare                          | 0.93 | (0.71, 1.22) |         |
| <b>Dual Eligible</b>              |      |              |         |
|                                   | 1.06 | (0.94, 1.18) |         |
| <b>Age</b>                        |      |              |         |
| Age                               | 1.63 | (1.18, 2.25) | **      |
| Age <sup>2</sup>                  | 0.70 | (0.29, 1.71) |         |
| <b>Sex</b>                        |      |              |         |
| Female                            | 1.15 | (1.05, 1.27) | **      |
| Male                              |      | Reference    |         |
| <b>Race</b>                       |      |              |         |
| White                             |      | Reference    |         |
| Black                             | 0.84 | (0.75, 0.94) | **      |
| Other                             | 0.70 | (0.54, 0.91) | **      |
| <b>Ethnicity</b>                  |      |              |         |
| Hispanic                          | 0.85 | (0.72, 0.99) | *       |
| <b>Employed</b>                   |      |              |         |
|                                   | 0.81 | (0.63, 1.06) |         |
| <b>BMI (kg/m<sup>2</sup>)</b>     |      |              |         |
| < 18.5                            | 1.01 | (0.79, 1.29) |         |
| 18.5 to < 30                      |      | Reference    |         |
| 30 to < 40                        | 0.97 | (0.87, 1.08) |         |
| ≥ 40                              | 1.03 | (0.89, 1.20) |         |
| <b>Albumin (g/dL)</b>             |      |              |         |
| < 2.5                             | 1.38 | (1.18, 1.62) | ***     |
| 2.5 to < 3                        | 1.16 | (0.99, 1.36) |         |
| 3 to < 3.5                        | 1.10 | (0.92, 1.31) |         |
| ≥ 3.5                             |      | Reference    |         |
| <b>Hemoglobin category (g/dL)</b> |      |              |         |
| < 8                               | 0.91 | (0.79, 1.06) |         |
| 8 to < 9                          | 1.01 | (0.89, 1.14) |         |

Supplemental material is neither peer-reviewed nor thoroughly edited by CJASN. The authors alone are responsible for the accuracy and presentation of the material.

|                                                         |      |              |     |
|---------------------------------------------------------|------|--------------|-----|
| 9 to < 11                                               |      | Reference    |     |
| ≥ 11                                                    | 0.94 | (0.82, 1.09) |     |
| <b>Comorbidities</b>                                    |      |              |     |
| Coronary Artery Disease                                 | 1.01 | (0.89, 1.13) |     |
| Congestive Heart Failure                                | 1.11 | (1.01, 1.23) | *   |
| Cancer                                                  | 1.23 | (1.06, 1.43) | **  |
| Hypertension                                            | 0.94 | (0.81, 1.08) |     |
| Chronic Obstructive Pulmonary Disease                   | 1.36 | (1.20, 1.54) | *** |
| Diabetes Mellitus                                       | 1.09 | (0.98, 1.20) |     |
| Peripheral Vascular Disease                             | 1.07 | (0.94, 1.22) |     |
| Prior Stroke                                            | 1.23 | (1.08, 1.41) | **  |
| Drug Dependence                                         | 1.17 | (0.86, 1.58) |     |
| Smoker                                                  | 0.93 | (0.78, 1.11) |     |
| Patient institutionalized                               | 1.32 | (1.14, 1.53) | *** |
| Needs Assistance with ADLs and/or Inability to Transfer | 1.24 | (1.09, 1.42) | **  |
| <b>Facility Characteristics</b>                         |      |              |     |
| Large Dialysis Organization                             | 0.98 | (0.88, 1.09) |     |
| Facility is for-profit                                  | 0.98 | (0.82, 1.17) |     |
| Facility is hospital-based                              | 0.95 | (0.76, 1.20) |     |
| <b>Total Facility Patients per Year</b>                 |      |              |     |
| 0 to 50                                                 | 0.89 | (0.78, 1.01) |     |
| 51 to 100                                               |      | Reference    |     |
| 101 to 150                                              | 0.97 | (0.86, 1.10) |     |
| > 150                                                   | 1.07 | (0.93, 1.24) |     |
| <b>Full Time Patient to Nurse/Tech Ratio</b>            |      |              |     |
| < 7                                                     |      | Reference    |     |
| ≥ 7                                                     | 0.95 | (0.87, 1.05) |     |
| <b>Residence Characteristics</b>                        |      |              |     |
| Urban                                                   | 1.11 | (1.00, 1.23) |     |
| <b>% Poverty in Zipcode</b>                             |      |              |     |
| < 15%                                                   |      | Reference    |     |
| 15% to <25%                                             | 1.05 | (0.93, 1.19) |     |
| ≥ 25%                                                   | 1.11 | (0.95, 1.29) |     |
| <b>% Less than High school Education in Zipcode</b>     |      |              |     |
| < 15%                                                   |      | Reference    |     |
| 15% to <30%                                             | 1.02 | (0.90, 1.15) |     |

*Supplemental material is neither peer-reviewed nor thoroughly edited by CJASN. The authors alone are responsible for the accuracy and presentation of the material.*

≥ 30% 0.90 (0.74, 1.08)

**Year of Dialysis Start**

|      |      |              |
|------|------|--------------|
| 2010 |      | Reference    |
| 2011 | 0.97 | (0.84, 1.11) |
| 2012 | 1.01 | (0.88, 1.16) |
| 2013 | 0.89 | (0.74, 1.08) |

**Season of Dialysis Start**

|        |      |              |
|--------|------|--------------|
| Winter |      | Reference    |
| Spring | 1.04 | (0.91, 1.18) |
| Summer | 1.08 | (0.95, 1.22) |
| Fall   | 1.01 | (0.88, 1.15) |

---

\*\*\* p < 0.001

\*\* p < 0.01

\* p < 0.05

**Table S10: Cox Regression Coefficients, Modeling Time to First Hospitalization Involving Any Infection, Medicaid versus No Insurance, Multiple Imputation Analysis**

| Covariate                         | HR   | 95% CI       | P-Value |
|-----------------------------------|------|--------------|---------|
| <b>Insurance</b>                  |      |              |         |
| No insurance                      |      | Reference    |         |
| Medicaid                          | 1.21 | (1.13, 1.30) | ***     |
| <b>Age</b>                        |      |              |         |
| Age                               | 0.94 | (0.90, 0.97) | ***     |
| Age <sup>2</sup>                  | 0.99 | (0.97, 1.02) |         |
| <b>Sex</b>                        |      |              |         |
| Female                            | 1.26 | (1.18, 1.36) | ***     |
| Male                              |      | Reference    |         |
| <b>Race</b>                       |      |              |         |
| White                             |      | Reference    |         |
| Black                             | 0.88 | (0.81, 0.96) | **      |
| Other                             | 0.74 | (0.62, 0.88) | ***     |
| <b>Ethnicity</b>                  |      |              |         |
| Hispanic                          | 0.81 | (0.73, 0.90) | ***     |
| <b>Employed</b>                   |      |              |         |
| Employed                          | 0.86 | (0.77, 0.97) | *       |
| <b>BMI (kg/m<sup>2</sup>)</b>     |      |              |         |
| < 18.5                            | 0.91 | (0.74, 1.12) |         |
| 18.5 to < 30                      |      | Reference    |         |
| 30 to < 40                        | 0.95 | (0.87, 1.03) |         |
| ≥ 40                              | 0.95 | (0.85, 1.07) |         |
| <b>Albumin (g/dL)</b>             |      |              |         |
| < 2.5                             | 1.68 | (1.49, 1.89) | ***     |
| 2.5 to < 3                        | 1.25 | (1.10, 1.41) | ***     |
| 3 to < 3.5                        | 1.14 | (1.01, 1.28) | *       |
| ≥ 3.5                             |      | Reference    |         |
| <b>Hemoglobin category (g/dL)</b> |      |              |         |
| < 8                               | 0.95 | (0.86, 1.05) |         |
| 8 to < 9                          | 0.98 | (0.89, 1.08) |         |
| 9 to < 11                         |      | Reference    |         |
| ≥ 11                              | 0.96 | (0.85, 1.07) |         |

Supplemental material is neither peer-reviewed nor thoroughly edited by CJASN. The authors alone are responsible for the accuracy and presentation of the material.

### Comorbidities

|                                                         |      |              |     |
|---------------------------------------------------------|------|--------------|-----|
| Coronary Artery Disease                                 | 1.06 | (0.93, 1.20) |     |
| Congestive Heart Failure                                | 1.11 | (1.02, 1.20) | *   |
| Cancer                                                  | 1.45 | (1.19, 1.77) | *** |
| Hypertension                                            | 0.91 | (0.82, 1.00) |     |
| Chronic Obstructive Pulmonary Disease                   | 1.22 | (1.06, 1.42) | **  |
| Diabetes Mellitus                                       | 1.18 | (1.09, 1.28) | *** |
| Peripheral Vascular Disease                             | 1.25 | (1.10, 1.42) | *** |
| Prior Stroke                                            | 1.11 | (0.97, 1.28) |     |
| Drug Dependence                                         | 1.54 | (1.36, 1.75) | *** |
| Smoker                                                  | 0.99 | (0.89, 1.10) |     |
| Patient institutionalized                               | 1.08 | (0.90, 1.30) |     |
| Needs Assistance with ADLs and/or Inability to Transfer | 1.24 | (1.09, 1.41) | **  |

### Facility Characteristics

|                             |      |              |  |
|-----------------------------|------|--------------|--|
| Large Dialysis Organization | 0.97 | (0.90, 1.06) |  |
| Facility is for-profit      | 1.09 | (0.96, 1.24) |  |
| Facility is hospital-based  | 1.12 | (0.95, 1.33) |  |

### Total Facility Patients per Year

|            |      |              |  |
|------------|------|--------------|--|
| 0 to 50    | 0.92 | (0.83, 1.02) |  |
| 51 to 100  |      | Reference    |  |
| 101 to 150 | 0.93 | (0.85, 1.01) |  |
| > 150      | 0.96 | (0.87, 1.06) |  |

### Full Time Patient to Nurse/Tech Ratio

|     |      |              |  |
|-----|------|--------------|--|
| < 7 |      | Reference    |  |
| ≥ 7 | 0.98 | (0.91, 1.05) |  |

### Residence Characteristics

|       |      |              |  |
|-------|------|--------------|--|
| Urban | 1.05 | (0.97, 1.14) |  |
|-------|------|--------------|--|

### % Poverty in Zipcode

|             |      |              |  |
|-------------|------|--------------|--|
| < 15%       |      | Reference    |  |
| 15% to <25% | 1.06 | (0.96, 1.16) |  |
| ≥ 25%       | 1.12 | (1.00, 1.25) |  |

### % Less than High school Education in Zipcode

|             |      |              |  |
|-------------|------|--------------|--|
| < 15%       |      | Reference    |  |
| 15% to <30% | 0.98 | (0.90, 1.07) |  |
| ≥ 30%       | 0.98 | (0.86, 1.12) |  |

Supplemental material is neither peer-reviewed nor thoroughly edited by CJASN. The authors alone are responsible for the accuracy and presentation of the material.

**Year of Dialysis Start**

|      |      |              |     |
|------|------|--------------|-----|
| 2010 |      | Reference    |     |
| 2011 | 0.95 | (0.86, 1.05) |     |
| 2012 | 0.94 | (0.85, 1.04) |     |
| 2013 | 0.79 | (0.69, 0.90) | *** |

**Season of Dialysis Start**

|        |      |              |  |
|--------|------|--------------|--|
| Winter |      | Reference    |  |
| Spring | 0.96 | (0.87, 1.06) |  |
| Summer | 0.97 | (0.88, 1.07) |  |
| Fall   | 0.97 | (0.88, 1.07) |  |

---

\*\*\*  $p < 0.001$

\*\*  $p < 0.01$

\*  $p < 0.05$

**Table S11: Results of Secondary and Sensitivity Analyses**

| Sensitivity Analyses                              | RR or HR | Medicare   | p-value | RR or HR | Medicaid   | p-value |
|---------------------------------------------------|----------|------------|---------|----------|------------|---------|
|                                                   |          | 95% CI     |         |          | 95% CI     |         |
| <b>RR of AVF/AVG at month 4</b>                   |          |            |         |          |            |         |
| Main Analysis                                     | 1.63     | 1.14, 2.43 | < 0.001 | 1.23     | 1.12, 1.38 | < 0.001 |
| Complete Case Analysis                            | 1.75     | 1.08, 2.78 | 0.024   | 1.19     | 1.06, 1.36 | < 0.001 |
| RR by month 6                                     | 1.54     | 1.10, 2.18 | 0.013   | 1.24     | 1.13, 1.35 | < 0.001 |
| Including pre-ESKD nephrology care                | 1.84     | 1.38, 2.53 | < 0.001 | 1.50     | 1.39, 1.61 | < 0.001 |
| <b>Time to switching to AVF/AVG after month 4</b> |          |            |         |          |            |         |
| Main Analysis                                     | 1.17     | 0.97, 1.42 | 0.11    | 1.01     | 0.96, 1.06 | 0.73    |
| Complete Case Analysis                            | 1.09     | 0.86, 1.37 | 0.49    | 1.00     | 0.94, 1.06 | 0.97    |
| Competing Risks Model                             | 1.11     | 0.92, 1.35 | 0.27    | 0.99     | 0.94, 1.04 | 0.79    |
| Including pre-ESKD nephrology care                | 1.12     | 0.97, 1.29 | 0.12    | 1.01     | 0.97, 1.06 | 0.60    |
| <b>RR of AVF/AVG at month 13</b>                  |          |            |         |          |            |         |
| Main Analysis                                     | 1.11     | 1.01, 1.22 | 0.040   | 1.01     | 1.00, 1.04 | 0.20    |
| Complete Case Analysis                            | 1.07     | 0.96, 1.20 | 0.23    | 1.01     | 0.99, 1.03 | 0.52    |
| Including pre-ESKD nephrology care                | 1.14     | 1.06, 1.21 | < 0.001 | 1.05     | 1.03, 1.07 | < 0.001 |

Abbreviations: RR = relative risks. HR = hazard ratio, AVF = arteriovenous fistula, AVG = arteriovenous graft, ESKD = end-stage kidney disease



## **APPENDIX REFERENCES**

1. Noridian Healthcare Solutions. Modifiers. (2018). Available at:  
<https://med.noridianmedicare.com/web/jfa/topics/modifiers>. (Accessed: 28th July 2018)
2. Lin, E., Kurella Tamura, M., Montez-Rath, M. E. & Chertow, G. M. Re-evaluation of re-hospitalization and rehabilitation in renal research. *Hemodial. Int.* **21**, 422–429 (2017).
3. Azur, M. J., Stuart, E. A., Frangakis, C. & Leaf, P. J. Multiple Imputation by Chained Equations: What is it and how does it work? *Int. J. Methods Psychiatr. Res.* **20**, 40–49 (2011).
4. Montez-Rath, M. E., Winkelmayr, W. C. & Desai, M. Addressing Missing Data in Clinical Studies of Kidney Diseases. *Clin. J. Am. Soc. Nephrol.* **9**, 1328–1335 (2014).
5. White, I. R., Daniel, R. & Royston, P. Avoiding bias due to perfect prediction in multiple imputation of incomplete categorical variables(). *Comput. Stat. Data Anal.* **54**, 2267–2275 (2010).
6. Rubin, D. B. *Multiple Imputation for Nonresponse in Surveys*. (John Wiley & Sons, 1987).
7. Schomaker, M. & Heumann, C. Bootstrap Inference when Using Multiple Imputation. *ArXiv Prepr. ArXiv160207933* (2016).
